# Supplementary material for: Effect of mixed occupancies on the thermoelectric properties of BaCu6−xSe1−yTe6+y polychalcogenides
Source: Royal Society of Chemistry journal article supplement (doi:10.1039/c9dt01616c), 2019-01-01
Supplement: c9dt01616c1.pdf [file c9dt01616c1.pdf]

## Effect of Mixed Occupancies on The Thermoelectric Properties of $\text{BaCu}_{6-x}\text{Se}_{1-y}\text{Te}_{6+y}$ Polychalcogenides

Parisa Jafarzadeh, Maegan R. Rodrigues, Yixuan Shi, Abdeljalil Assoud, Tianze Zou, Jan B. Kycia, Holger Kleinke\*

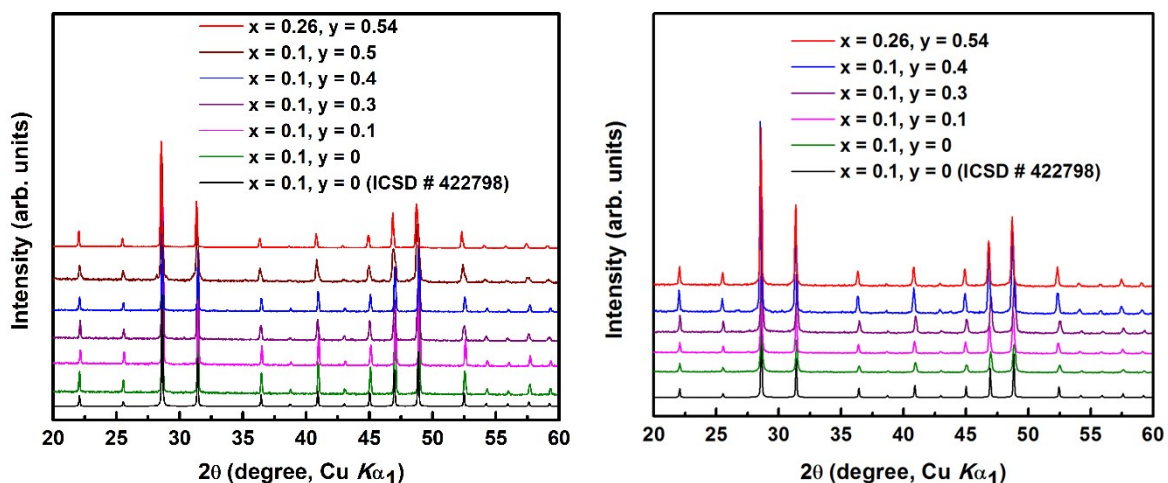

Fig. S1 Room temperature powder XRD patterns of  $\text{BaCu}_{6-x}\text{Se}_{1-y}\text{Te}_{6+y}$ . Left: before hot-pressing; right: after hot-pressing.

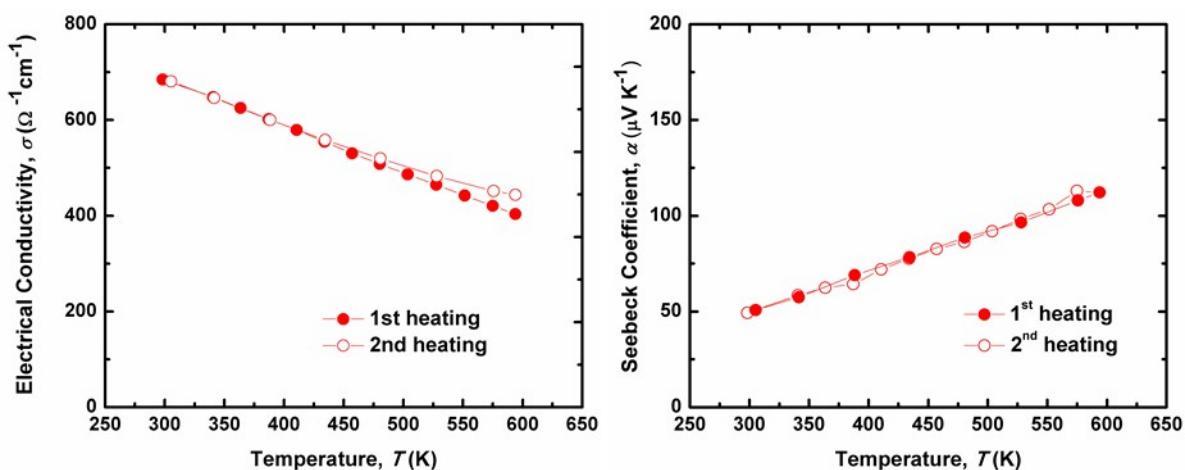

Fig. S2 Stability of the electrical transport properties of “ $\text{BaCu}_{5.74}\text{Se}_{0.46}\text{Te}_{6.54}$ ”.

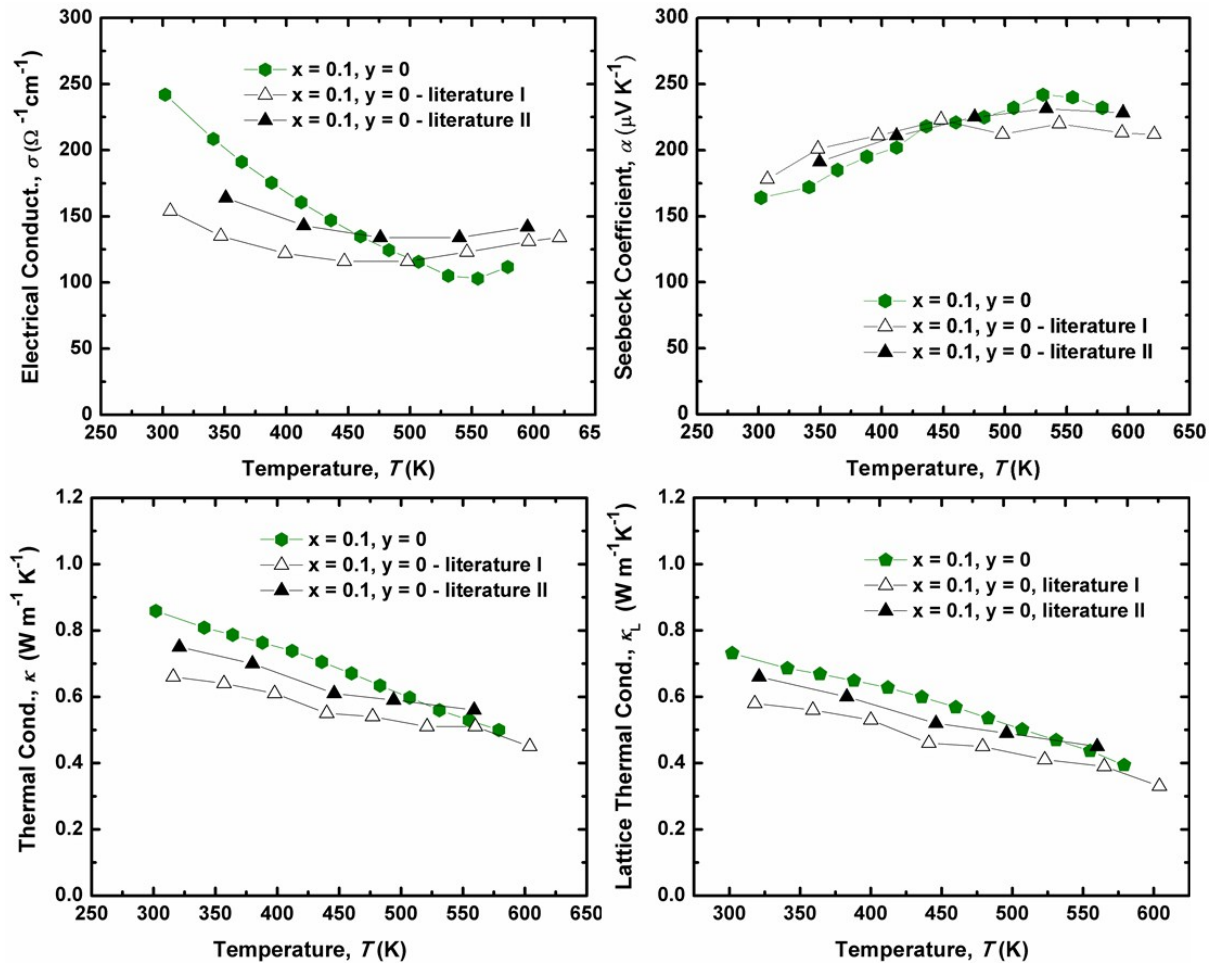

Fig. S3 Physical properties of “BaCu<sub>5.9</sub>SeTe<sub>6</sub>”.

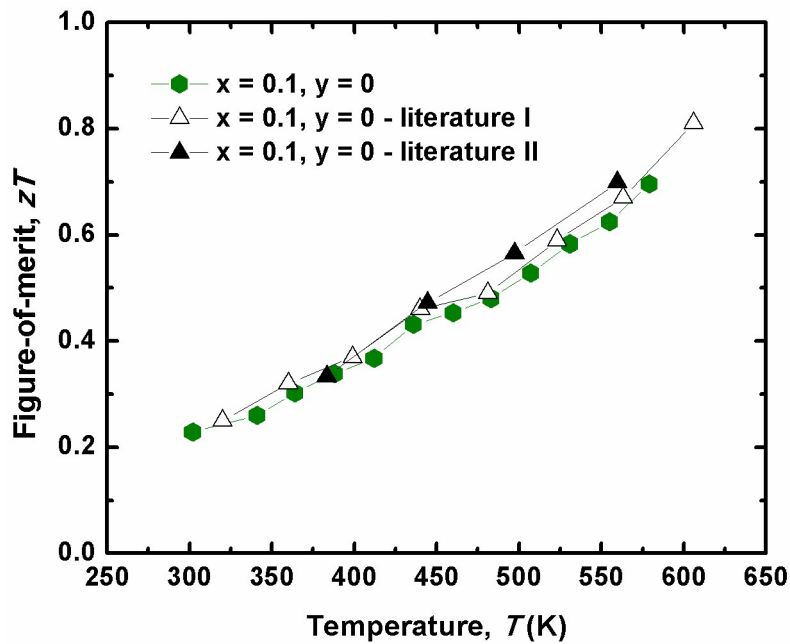

Fig S4 Reproducibility of the  $zT$  values of “BaCu<sub>5.9</sub>SeTe<sub>6</sub>”.

Table S1. Fractional atomic coordinates, equivalent isotropic displacement parameters and occupancies of  $\text{BaCu}_{5.74(2)}\text{Se}_{0.69(1)}\text{Te}_{6.31}$ .

|              | Site | x             | y             | z             | $U_{eq}/\text{\AA}^2$ |
|--------------|------|---------------|---------------|---------------|-----------------------|
| Ba1          | 1b   | $\frac{1}{2}$ | $\frac{1}{2}$ | $\frac{1}{2}$ | 0.0209(2)             |
| Cu1          | 8i   | 0.19980(7)    | x             | x             | 0.0254(3)             |
| Te1          | 6f   | 0.30021(5)    | 0             | $\frac{1}{2}$ | 0.0172(1)             |
| Q (Se2, Te2) | 1a   | 0             | 0             | 0             | 0.0428(6)             |

Table S2. Fractional atomic coordinates, equivalent isotropic displacement parameters and occupancies of  $\text{BaCu}_{5.80(3)}\text{Se}_{0.64(2)}\text{Te}_{6.36}$ .

|              | Site | x             | y             | z             | $U_{eq}/\text{\AA}^2$ |
|--------------|------|---------------|---------------|---------------|-----------------------|
| Ba1          | 1b   | $\frac{1}{2}$ | $\frac{1}{2}$ | $\frac{1}{2}$ | 0.0216(4)             |
| Cu1          | 8i   | 0.2001(1)     | x             | x             | 0.0274(6)             |
| Te1          | 6f   | 0.30031(8)    | 0             | $\frac{1}{2}$ | 0.0183(3)             |
| Q (Se2, Te2) | 1a   | 0             | 0             | 0             | 0.046(1)              |

Table S3. Fractional atomic coordinates, equivalent isotropic displacement parameters and occupancies of  $\text{BaCu}_{5.74(2)}\text{Se}_{0.43(2)}\text{Te}_{6.57}$ .

|              | Site | x             | y             | z             | $U_{eq}/\text{\AA}^2$ |
|--------------|------|---------------|---------------|---------------|-----------------------|
| Ba1          | 1b   | $\frac{1}{2}$ | $\frac{1}{2}$ | $\frac{1}{2}$ | 0.0211(2)             |
| Cu1          | 8i   | 0.20018(6)    | x             | x             | 0.0269(2)             |
| Te1          | 6f   | 0.30031(8)    | 0             | $\frac{1}{2}$ | 0.0175(1)             |
| Q (Se2, Te2) | 1a   | 0             | 0             | 0             | 0.0578(5)             |

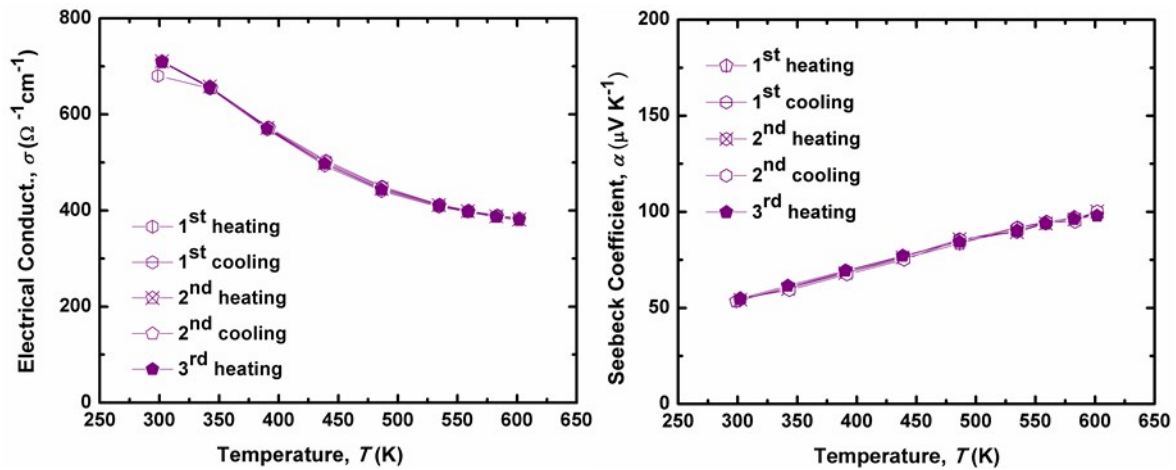

Fig. S5 Stability of the electrical transport properties of “ $\text{BaCu}_{5.74}\text{Se}_{0.6}\text{Te}_{6.4}$ ”.
